# Supplementary material for: Impact of Different Approaches to Preparing Notes for Analysis With Natural Language Processing on the Performance of Prediction Models in Intensive Care
Source: PubMed Central journal article supplement — Crit Care Explor. 2021 Jun 11;3(6):e0450. doi: 10.1097/CCE.0000000000000450 (PMC8202578; doi:10.1097/cce.0000000000000450), 2021-06-11

## Supplemental Figure Titles and Captions

Supplemental Figure 1: Term Frequency – Inverse Document Frequency (TF-IDF) Equation

Supplemental Figure 2: Model Development and Validation

UCSF- University of California, San Francisco, BIDMC – Beth Israel Deaconess Medical Center, AUROC – Area Under the Receiving-Operator Curve

Supplemental Figure 3: Calibration Curves for Penalized Logistic Regression Models

The bottom bar graph reports the number of patients found in each decile of predicted mortality. Mortality on the y axis of the line graph represents actual computed mortality rate for patients in each decile. The TF-IDF model does not report a 10<sup>th</sup> point because the model did not predict any patients to have a probability of mortality between 0.9 and 1.

Supplemental Figure 4: Calibration Curves for Feedforward Neural Network Models

The bottom bar graph reports the number of patients found in each decile of predicted mortality. Mortality on the y axis of the line graph represents actual computed mortality rate for patients in each decile.

Supplemental Figure 5: Calibration Curves for Random Forest Models

The bottom bar graph reports the number of patients found in each decile of predicted mortality. Mortality on the y axis of the line graph represents actual computed mortality rate for patients in each decile.

Term Frequency:  $tf(t,d)$  = Number of times term  $t$  is present in document  $d$

Document Frequency (df) = Number of times term  $t$  is present in the document corpus  $N$

Inverse Document Frequency of term  $t$   
 $idf(t) = \log(N/(df + 1))$

TF-IDF Formula: for term  $t$  in document  $d$  within a document corpus  $N$

$$tf-idf(t,d) = tf(t,d) * \log(N/(df+1))$$

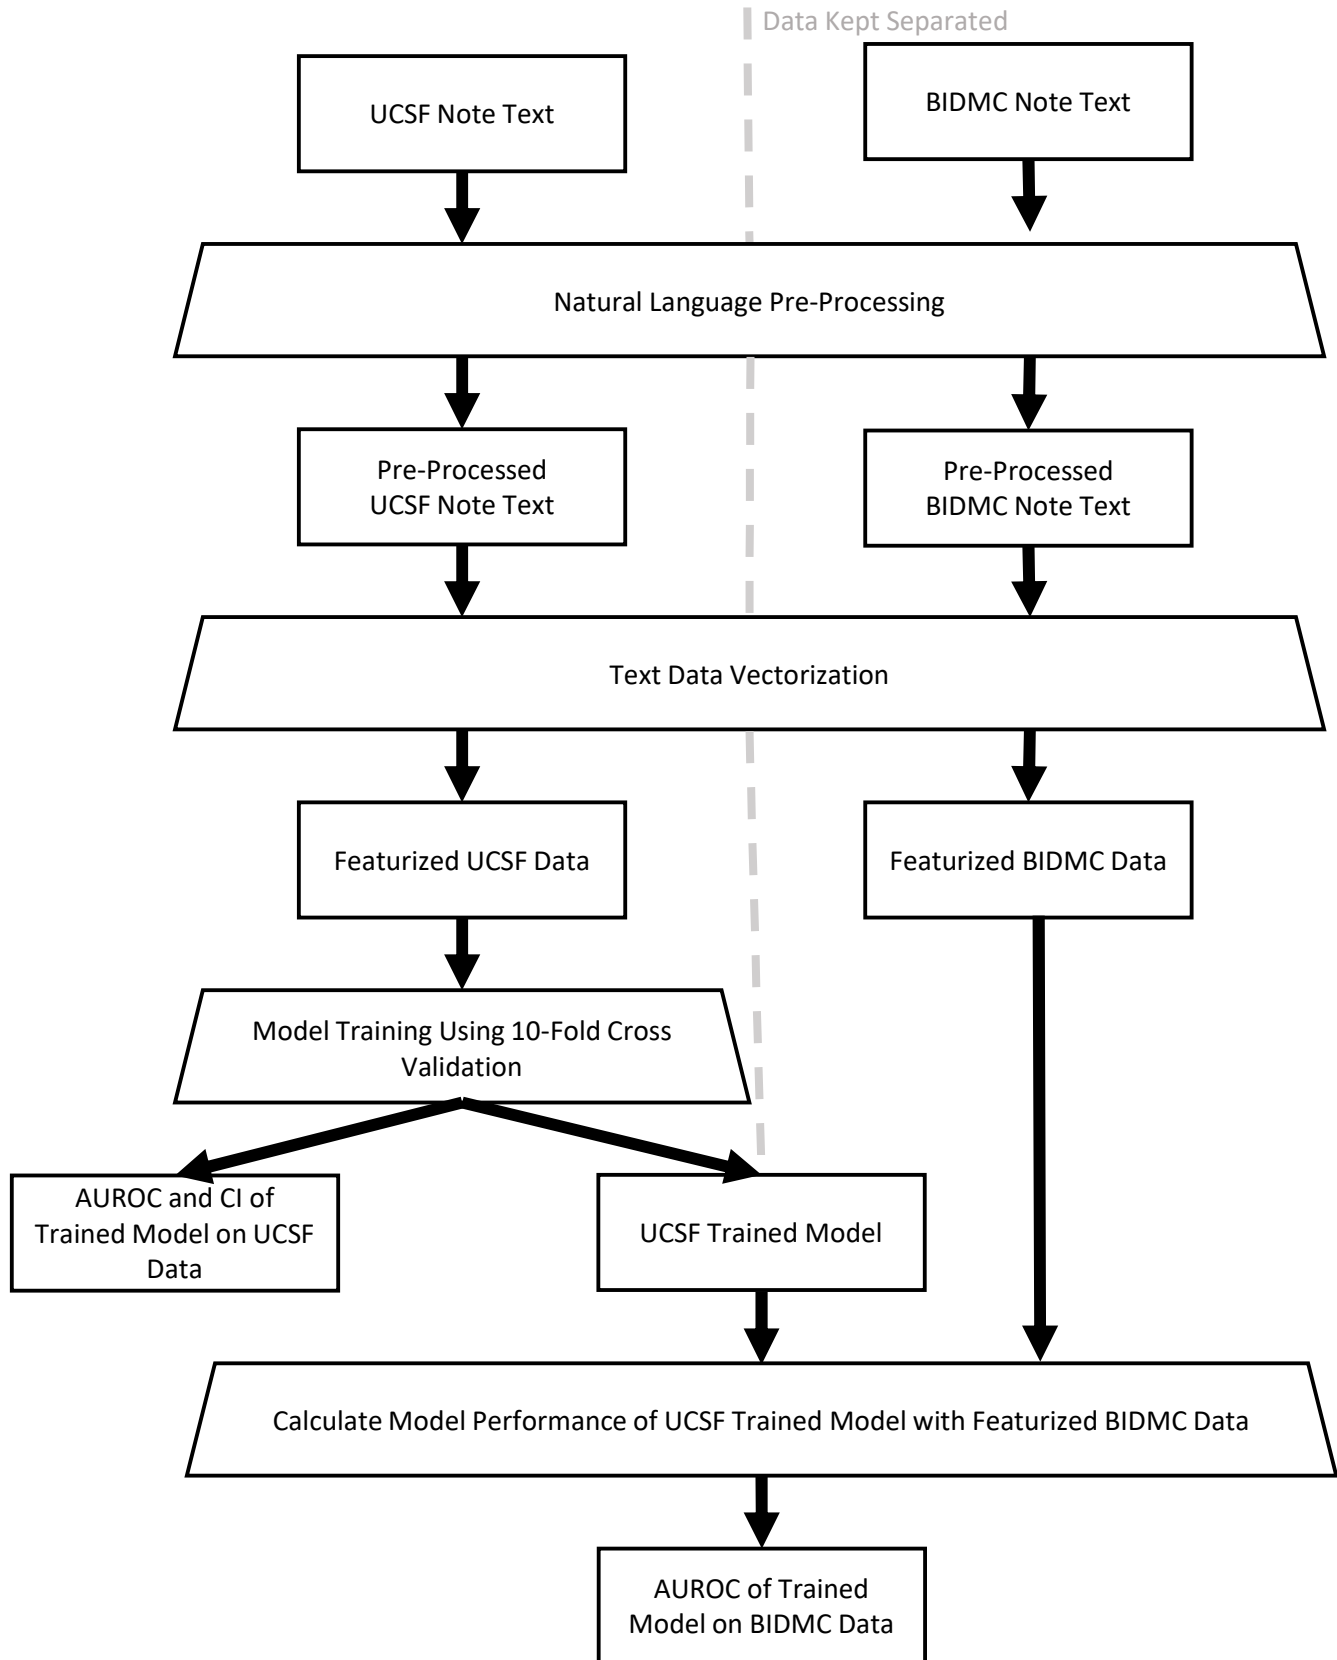

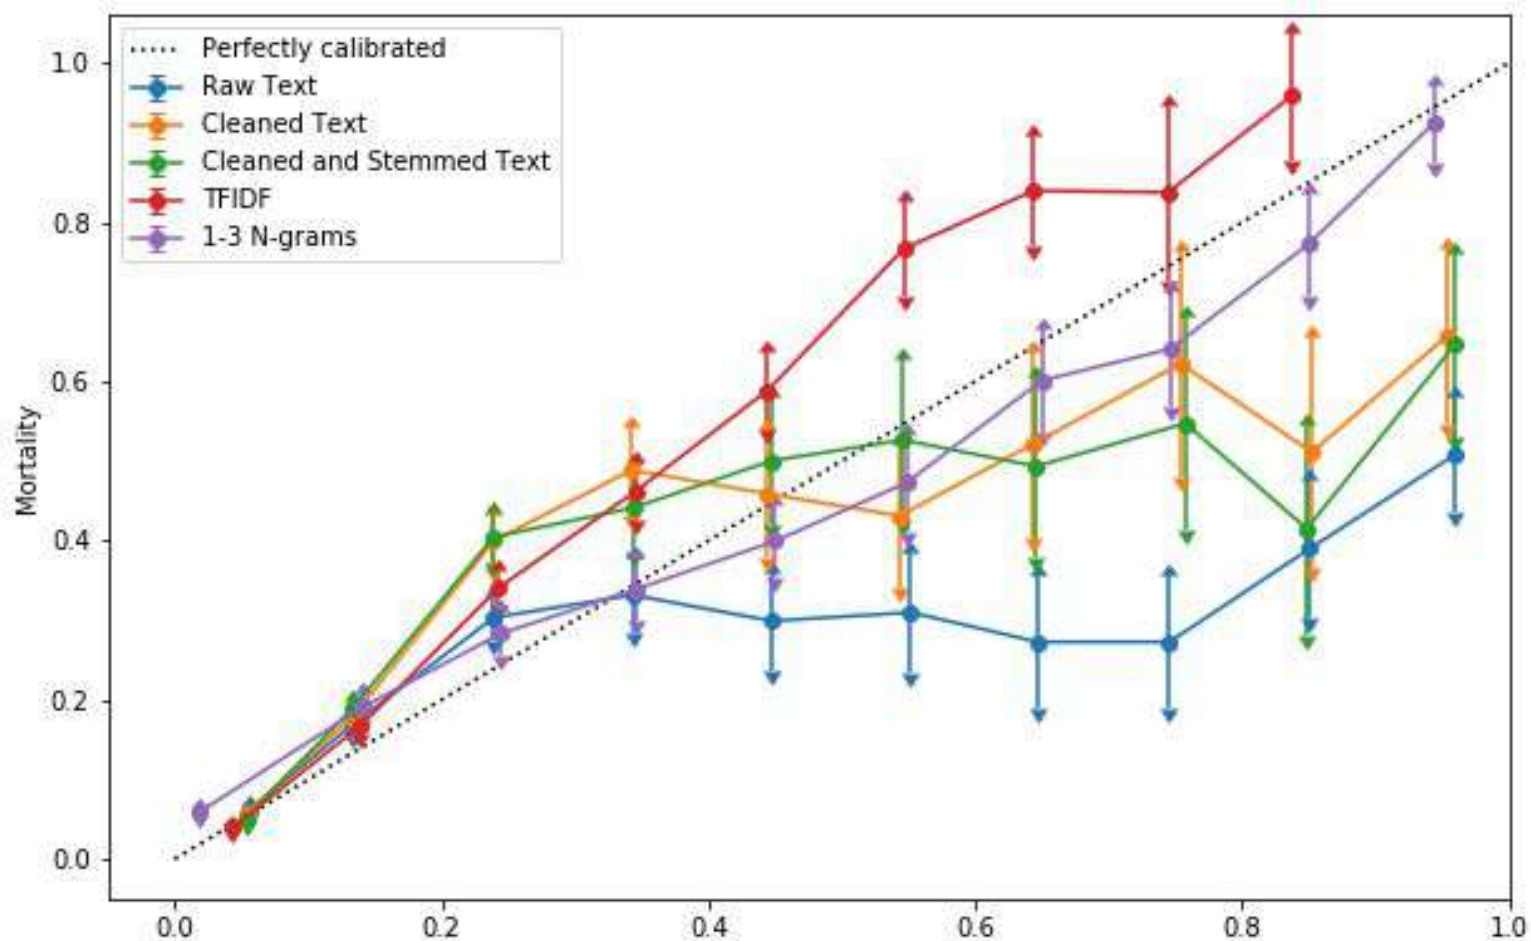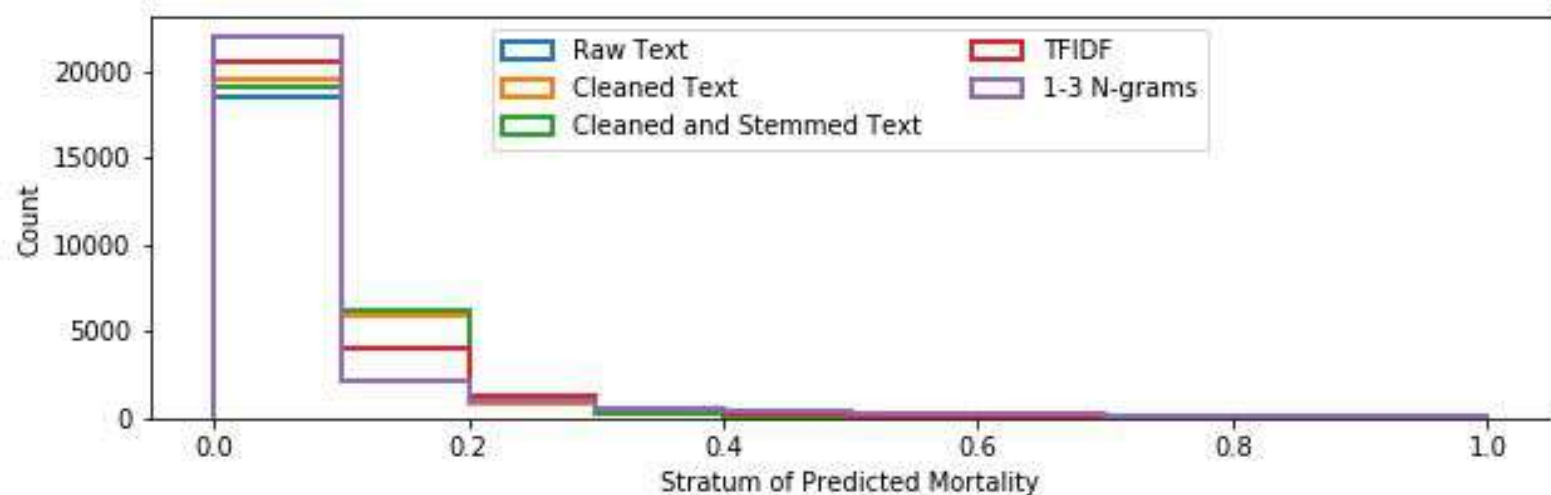

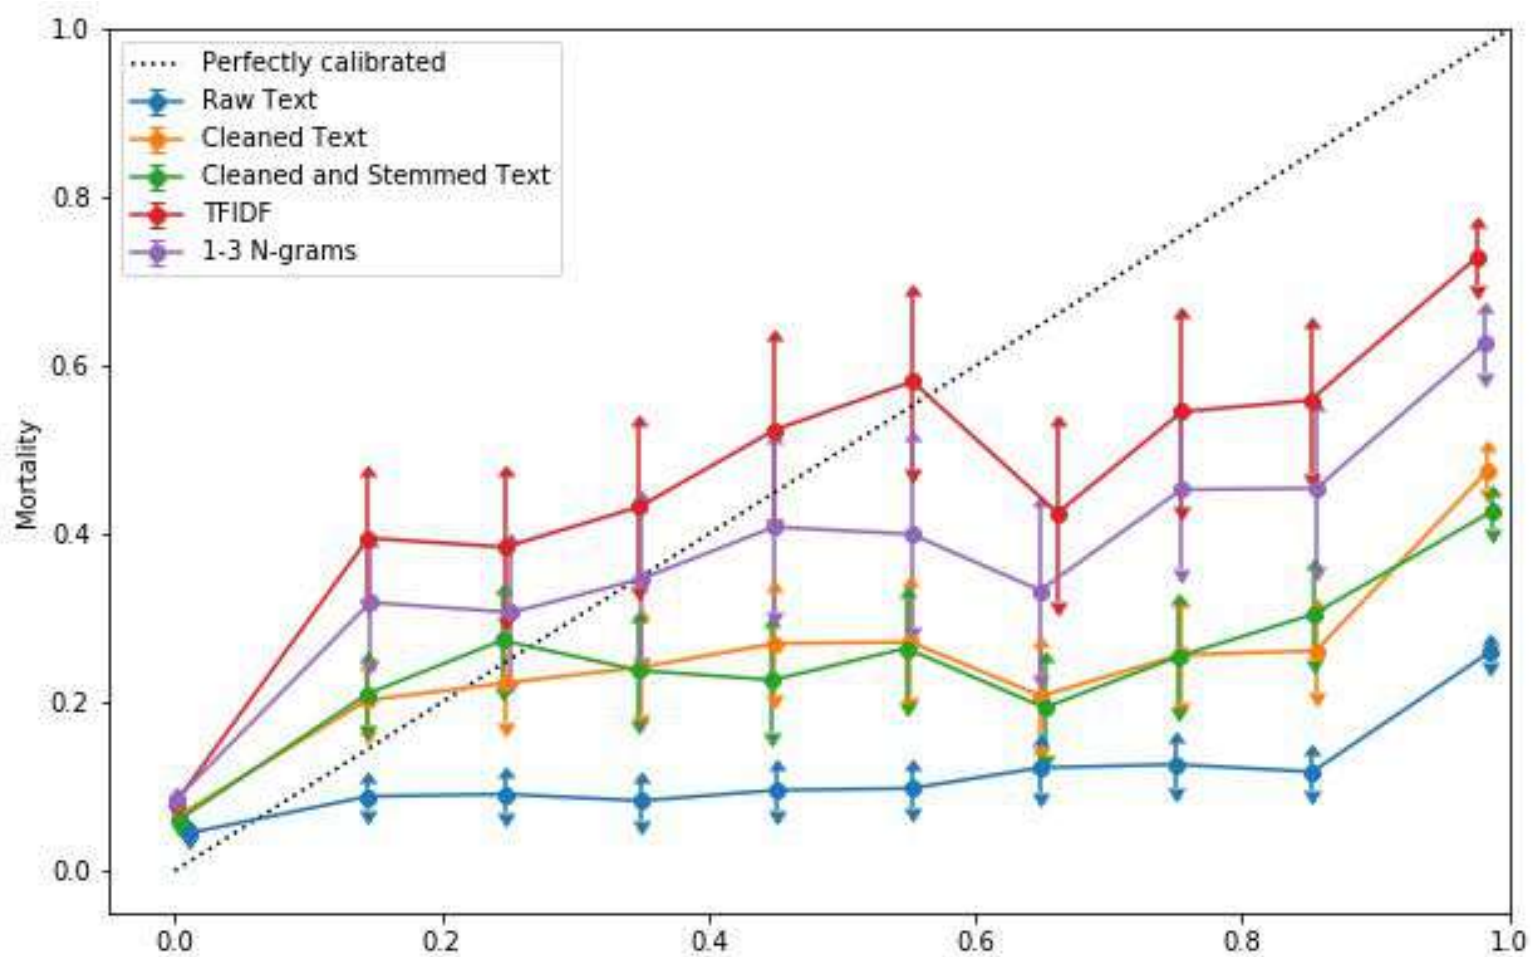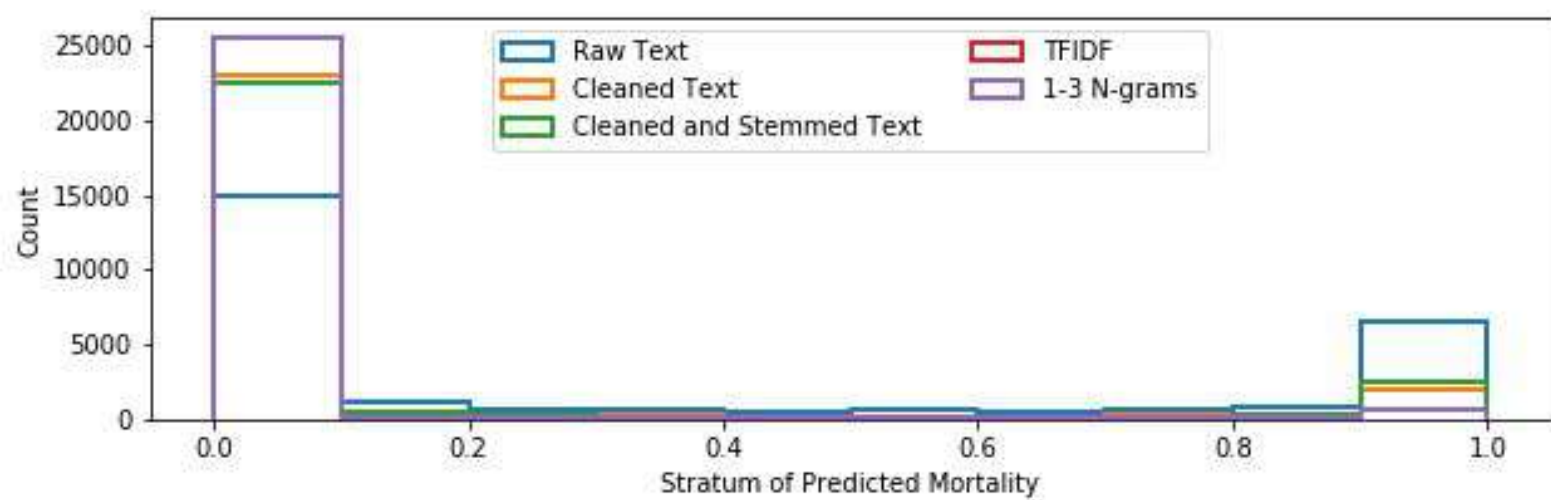

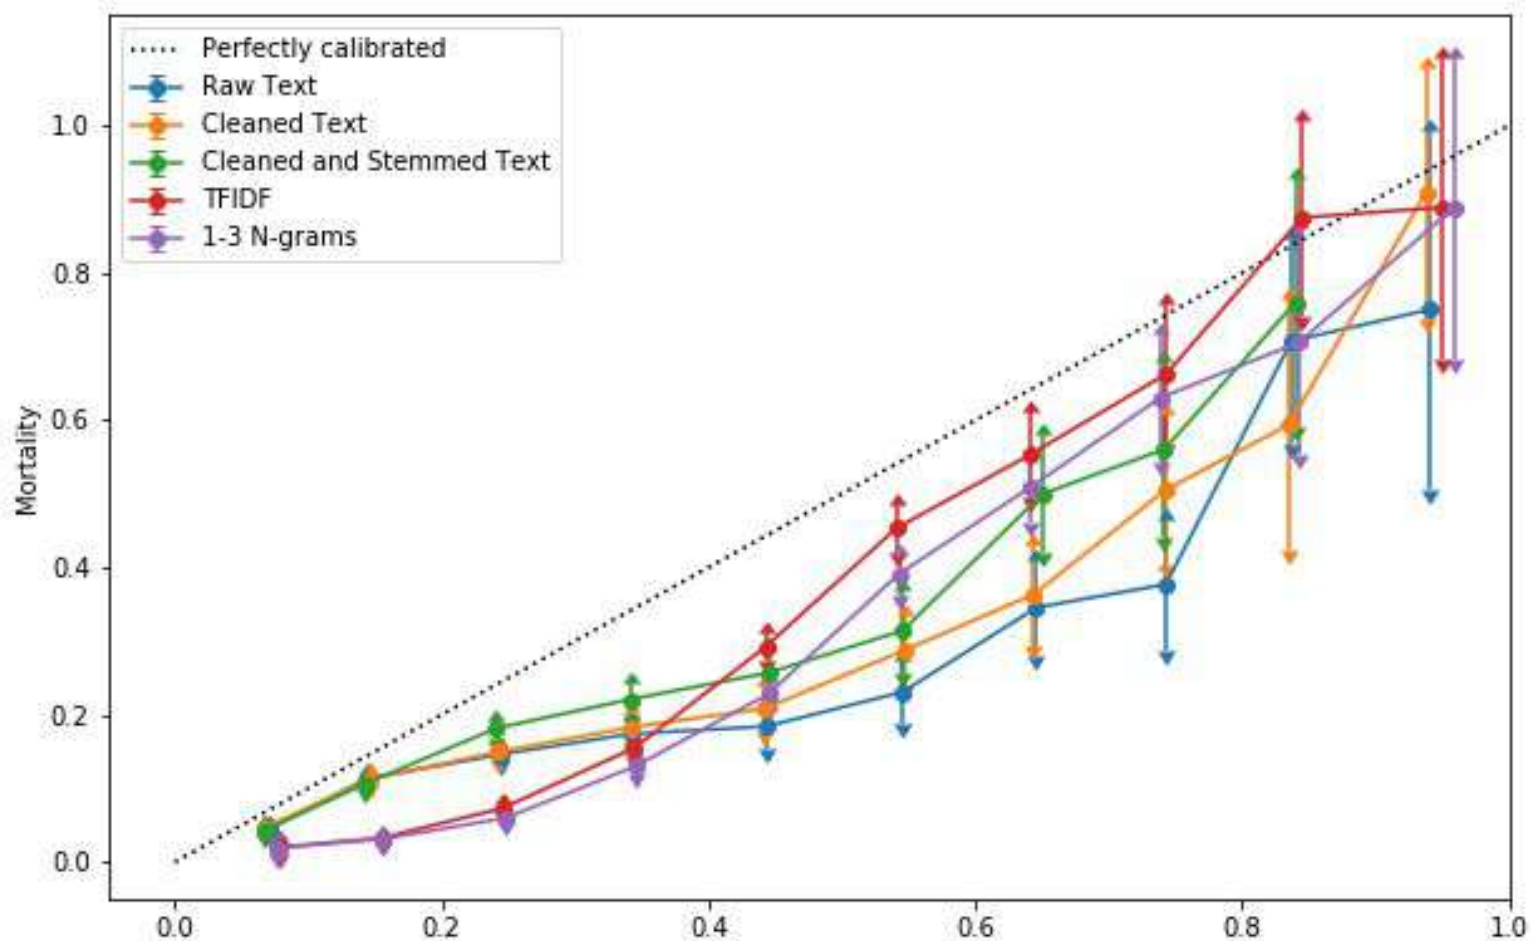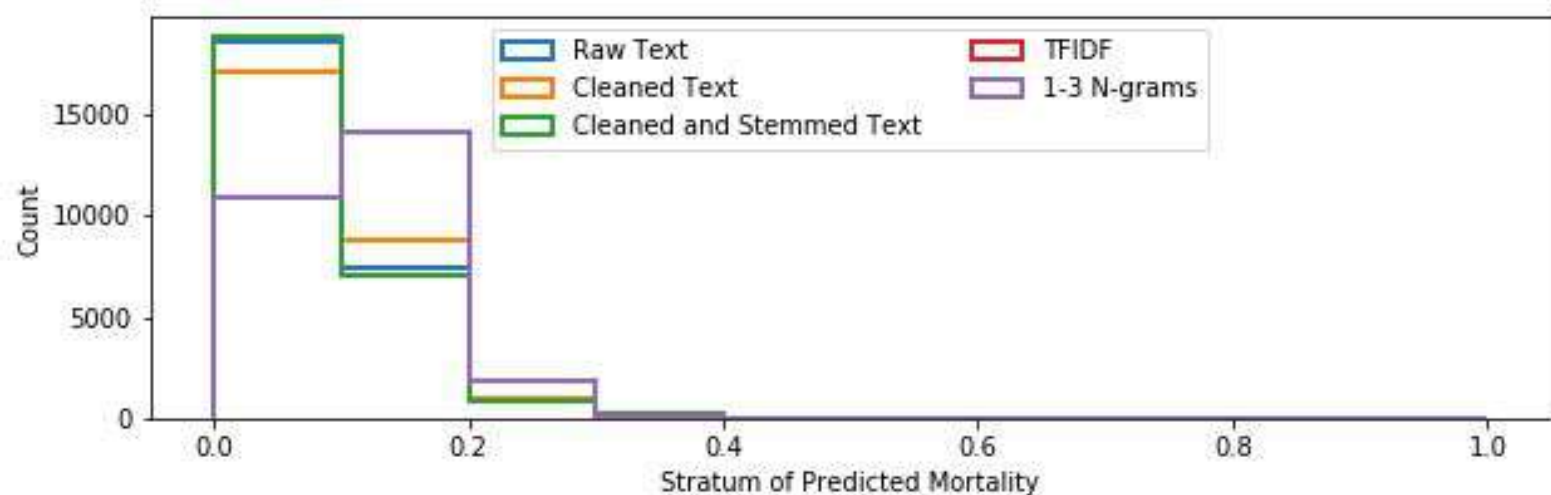

Supplement: cc9-3-e0450-s001.pdf [file cc9-3-e0450-s001.pdf]
