# Supplementary material for: Impact of Different Approaches to Preparing Notes for Analysis With Natural Language Processing on the Performance of Prediction Models in Intensive Care
Source: PubMed Central journal article supplement — Crit Care Explor. 2021 Jun 11;3(6):e0450. doi: 10.1097/CCE.0000000000000450 (PMC8202578; doi:10.1097/cce.0000000000000450), 2021-06-11
Supplement: cc9-3-e0450-s002.pdf [file cc9-3-e0450-s002.pdf]

Supplemental Table 1: Stop Words in the Python Natural Language Tool Kit (NLTK)

| <b>Default Stop words in Python NLTK package</b>                                                                                                                                                                                                                                                                                                                                                                                                                                                                                                                                                                                                                                                                                                                                                                                                                                                                                                                                                                                                                                                                                                          |
|-----------------------------------------------------------------------------------------------------------------------------------------------------------------------------------------------------------------------------------------------------------------------------------------------------------------------------------------------------------------------------------------------------------------------------------------------------------------------------------------------------------------------------------------------------------------------------------------------------------------------------------------------------------------------------------------------------------------------------------------------------------------------------------------------------------------------------------------------------------------------------------------------------------------------------------------------------------------------------------------------------------------------------------------------------------------------------------------------------------------------------------------------------------|
| i, me, my, myself, we, our, ours, ourselves, you, you're, you've, you'll, you'd, your, yours, yourself, yourselves, he, him, his, himself, she, she's, her, hers, herself, it, it's, its, itself, they, them, their, theirs, themselves, what, which, who, whom, this, that, that'll, these, those, am, is, are, was, were, be, been, being, have, has, had, having, do, does, did, doing, a, an, the, and, but, if, or, because, as, until, while, of, at, by, for, with, about, against, between, into, through, during, before, after, above, below, to, from, up, down, in, out, on, off, over, under, again, further, then, once, here, there, when, where, why, how, all, any, both, each, few, more, most, other, some, such, no, nor, not, only, own, same, so, than, too, very, s, t, can, will, just, don, don't, should, should've, now, d, ll, m, o, re, ve, y, ain, aren, aren't, couldn, couldn't, didn, didn't, doesn, doesn't, hadn, hadn't, hasn, hasn't, haven, haven't, isn, isn't, ma, mightn, mightn't, mustn, mustn't, needn, needn't, shan, shan't, shouldn, shouldn't, wasn, wasn't, weren, weren't, won, won't, wouldn, wouldn't |

Supplemental Table 2: Terms Removed From the Default Stop Word List in the Python Natural Language Tool Kit (NLTK)

| <b>Stop words removed from the default NLTK package that represent negation</b> |
|---------------------------------------------------------------------------------|
| No, nor, not, don, don't, wasn, wasn't, weren, weren't                          |

Supplemental Table 3: Impact of pre-processing strategies on machine learning model performance

|                          | Feed Forward Neural Network                                          |                                          | Random Forest                                                        |                                          |
|--------------------------|----------------------------------------------------------------------|------------------------------------------|----------------------------------------------------------------------|------------------------------------------|
|                          | AUCROC (95 <sup>th</sup> % CI) for UCSF Model Validated on UCSF Data | AUCROC for UCSF Model Validated on BIDMC | AUCROC (95 <sup>th</sup> % CI) for UCSF Model Validated on UCSF Data | AUCROC for UCSF Model Validated on BIDMC |
| Raw Text                 | 0.85 (0.80-0.90)                                                     | 0.76                                     | 0.87 (0.82-0.93)                                                     | 0.67                                     |
| Cleaned Text             | 0.87 (0.82-0.92)                                                     | 0.78                                     | 0.88 (0.82-0.93)                                                     | 0.68                                     |
| Cleaned and Stemmed Text | 0.86 (0.81-0.90)                                                     | 0.80                                     | 0.88 (0.82-0.94)                                                     | 0.71                                     |
| TF-IDF                   | 0.88 (0.84-0.92)                                                     | 0.81                                     | 0.89 (0.83-0.94)                                                     | 0.79                                     |
| 1-3 N-grams              | 0.88 (0.84 -0.92)                                                    | 0.78                                     | 0.88 (0.83-0.93)                                                     | 0.77                                     |

AUCROC = Area Under the Receiver-Operating Characteristic Curve, CI = Confidence Interval, TF-IDF = Term Frequency – Inverse Document Frequency

Supplemental Table 4: Comparison of statistical model selection and pre-processing strategy on model performance.

|        | Penalized Logistic Regression |        | Feed Forward Neural Network |        | Random Forest |        |
|--------|-------------------------------|--------|-----------------------------|--------|---------------|--------|
|        | Raw Text                      | TF-IDF | Raw Text                    | TF-IDF | Raw Text      | TF-IDF |
| AUCROC | 0.72                          | 0.83   | 0.76                        | 0.81   | 0.67          | 0.77   |

AUCROC = Area Under the Receiver-Operating Characteristic Curve. TF-IDF = Term Frequency – Inverse Document Frequency

Supplemental Table 5: Top 30 most predictive terms, ranked by absolute value of contribution to probability of mortality, for the penalized logistic regression model depending on the stage of text pre-processing

| Raw Text |                             |           | Clean Text |                             |           | Stem |                             |           | TF-IDF |                             |           | N-Grams |                             |           |
|----------|-----------------------------|-----------|------------|-----------------------------|-----------|------|-----------------------------|-----------|--------|-----------------------------|-----------|---------|-----------------------------|-----------|
| Term     | Impact on Risk of Mortality |           | Term       | Impact on Risk of Mortality |           | Term | Impact on Risk of Mortality |           | Term   | Impact on Risk of Mortality |           | Term    | Impact on Risk of Mortality |           |
| 1        | risks                       | Survival  | 1          | silt                        | Survival  | 1    | silt                        | Survival  | 1      | pupil                       | Mortality | 1       | pupil                       | Mortality |
| 2        | pupils                      | Mortality | 2          | risks                       | Survival  | 2    | psychiatr                   | Survival  | 2      | normal                      | Survival  | 2       | extub                       | Survival  |
| 3        | equal                       | Survival  | 3          | pupils                      | Mortality | 3    | cardiovascular              | Mortality | 3      | worsen                      | Mortality | 3       | famili                      | Mortality |
| 4        | cardiovascular              | Mortality | 4          | poor                        | Mortality | 4    | gastrointestin              | Survival  | 4      | famili                      | Mortality | 4       | poor                        | Mortality |
| 5        | monitoring                  | Survival  | 5          | cardiovascular              | Mortality | 5    | clean                       | Survival  | 5      | intub                       | Mortality | 5       | worsen                      | Mortality |
| 6        | atraumatic                  | Mortality | 6          | psychiatric                 | Survival  | 6    | pupil                       | Mortality | 6      | metastat                    | Mortality | 6       | normal                      | Survival  |
| 7        | psychiatric                 | Survival  | 7          | phone                       | Mortality | 7    | phone                       | Mortality | 7      | call                        | Mortality | 7       | well                        | Survival  |
| 8        | role                        | Survival  | 8          | gastrointestinal            | Survival  | 8    | poor                        | Mortality | 8      | diffus                      | Mortality | 8       | goal                        | Mortality |
| 9        | maker                       | Mortality | 9          | equal                       | Survival  | 9    | extub                       | Survival  | 9      | poor                        | Mortality | 9       | headach                     | Survival  |
| 10       | planned                     | Survival  | 10         | epinephrine                 | Mortality | 10   | epinephrin                  | Mortality | 10     | ascit                       | Mortality | 10      | clear                       | Survival  |
| 11       | face                        | Survival  | 11         | motion                      | Mortality | 11   | glu                         | Survival  | 11     | comfort                     | Mortality | 11      | support                     | Mortality |
| 12       | death                       | Mortality | 12         | signs                       | Survival  | 12   | face                        | Survival  | 12     | hemorrhag                   | Mortality | 12      | call                        | Mortality |
| 13       | bedside                     | Mortality | 13         | clean                       | Survival  | 13   | reconstruct                 | Survival  | 13     | support                     | Mortality | 13      | anesthesia                  | Survival  |
| 14       | gastrointestinal            | Survival  | 14         | commands                    | Survival  | 14   | structur                    | Mortality | 14     | extub                       | Survival  | 14      | cough                       | Mortality |
| 15       | lumbar                      | Mortality | 15         | clear                       | Survival  | 15   | adult                       | Survival  | 15     | failur                      | Mortality | 15      | bedsid                      | Mortality |
| 16       | these                       | Survival  | 16         | monitoring                  | Survival  | 16   | motion                      | Mortality | 16     | deni                        | Survival  | 16      | sodium                      | Mortality |
| 17       | glu                         | Survival  | 17         | atraumatic                  | Mortality | 17   | encount                     | Mortality | 17     | care                        | Mortality | 17      | diffus                      | Mortality |
| 18       | wheezes                     | Survival  | 18         | removal                     | Survival  | 18   | needl                       | Survival  | 18     | bedsid                      | Mortality | 18      | care                        | Mortality |
| 19       | signs                       | Survival  | 19         | headaches                   | Survival  | 19   | anesthesia                  | Survival  | 19     | anesthesia                  | Survival  | 19      | progress                    | Mortality |
| 20       | commands                    | Survival  | 20         | face                        | Survival  | 20   | equal                       | Survival  | 20     | well                        | Survival  | 20      | stop                        | Mortality |
| 21       | q15                         | Survival  | 21         | needle                      | Survival  | 21   | distend                     | Mortality | 21     | discuss                     | Mortality | 21      | report                      | Survival  |
| 22       | po4                         | Survival  | 22         | iliac                       | Survival  | 22   | pack                        | Mortality | 22     | effus                       | Mortality | 22      | intraven<br>continu         | Survival  |
| 23       | symptoms                    | Survival  | 23         | support                     | Mortality | 23   | symptom                     | Survival  | 23     | goal                        | Mortality | 23      | deni                        | Survival  |
| 24       | motion                      | Mortality | 24         | reported                    | Survival  | 24   | death                       | Mortality | 24     | resect                      | Survival  | 24      | albumin                     | Mortality |
| 25       | 91                          | Mortality | 25         | glu                         | Survival  | 25   | headach                     | Survival  | 25     | epinephrin                  | Mortality | 25      | diseas                      | Mortality |
| 26       | zofran                      | Mortality | 26         | set                         | Survival  | 26   | sign                        | Survival  | 26     | peripher                    | Mortality | 26      | intraven<br>prn             | Mortality |
| 27       | alert                       | Survival  | 27         | occupational                | Mortality | 27   | uop                         | Survival  | 27     | oper                        | Survival  | 27      | alert                       | Survival  |
| 28       | resection                   | Survival  | 28         | encounter                   | Mortality | 28   | transaminas                 | Mortality | 28     | malign                      | Mortality | 28      | anterior                    | Mortality |
| 29       | very                        | Mortality | 29         | Night                       | Survival  | 29   | clear                       | Survival  | 29     | patient                     | Mortality | 29      | symptom                     | Survival  |
| 30       | sch                         | Survival  | 30         | reason                      | Mortality | 30   | anterior                    | Mortality | 30     | headach                     | Survival  | 30      | discuss                     | Mortality |

TF-IDF = Term Frequency – Inverse Document Frequency
